# Supplementary material
Source: publisher figshare collection journal article supplement (https://acs.figshare.com/ndownloader/files/5692812)
Supplement: Supplementary file 1 [file 5692812]

# ic0111482.cif

data_global
# 1. SUBMISSION DETAILS

_publ_contact_autor
;
         A. Monge
         Instituto de Ciencia de Materiales
         CSIC
         Campus de Cantoblanco
         28049 MADRID
         Spain
;
_publ_contact_author_phone        '34 1 334-9025'
_publ_contact_author_fax          '34 1 372-0623'
_publ_contact_author_email        amonge@icmm.csic.es
_publ_requested_journal           'Inorganic Chemistry.'
_publ_requested_coeditor_name

_publ_contact_letter
;
   ?
;


#===========================================================================
===

# 3. TITLE AND AUTHOR LIST

_publ_section_title;
In2(OH)3(BDC)1.5 (BDC=1,4-benzendicarboxylate), a Thermally Stable
  IN(III)Supramolecular 3D Framework. Catalitic Activity.
;

loop_
_publ_author_name
_publ_author_address
      'Berta Gomez-Lor'
;
         Instituto de Ciencia de Materiales
         CSIC
         Campus de Cantoblanco
         28049 MADRID
         Spain

;
      'Enrique GutierrezPuebla'
;
  Instituto de Ciencia de Materiales
         CSIC
         Campus de Cantoblanco
         28049 MADRID
         Spain


;
      'Marta Iglesias'
;
  Instituto de Ciencia de Materiales
         CSIC
         Campus de Cantoblanco
         28049 MADRID
         Spain

;
      'M. Angeles Monge'
;
         Instituto de Ciencia de Materiales
         CSIC
         Campus de Cantoblanco
         28049 MADRID
         Spain
;
     'Caridad Ruiz Valero'
;
         Instituto de Ciencia de Materiales
         CSIC
         Campus de Cantoblanco
         28049 MADRID
         Spain
;

  'Natalia Snejko'
;
         Instituto de Ciencia de Materiales
         CSIC
         Campus de Cantoblanco
         28049 MADRID
         Spain
;


#===========================================================================
===

# 4. TEXT

_publ_section_abstract
;
  The new organo-inorganic polymer In2(OH)3[O4C8H4]1.5 has been
hydrothermally  obtained.
The crystal structure of this material has been established by single
crystal X-ray
diffraction. The In atoms are bonded to three OH anions and three oxygen
atoms coming
from three different carboxylate molecules in octahedral coordination. The
resulting
polymeric 3D structure can be envisaged as having been generated from a
honeycomb (6,3) 2D
that is cross-linked by the BCD organic anions. Data of IR and DTA-TG,
as well as the results of catalytic studies are reported.


;
_publ_section_comment
;

;
_publ_section_experimental
;

;
_publ_section_references
;

;

_publ_section_figure_captions
;

;
_publ_section_acknowledgements
;


data_In2(OH)3(BCD)1.5

_audit_creation_method            SHELXL
_chemical_name_systematic
;
  ?
;
_chemical_name_common             ?
_chemical_formula_moiety          ?
_chemical_formula_structural      ?
_chemical_formula_analytical      ?
_chemical_formula_sum             'C12 H9 In2 O9'
_chemical_formula_weight          526.83
_chemical_melting_point           ?
_chemical_compound_source         ?

loop_
  _atom_type_symbol
  _atom_type_description
  _atom_type_scat_dispersion_real
  _atom_type_scat_dispersion_imag
  _atom_type_scat_source
  'C'  'C'   0.0033   0.0016
  'International Tables Vol C Tables 4.2.6.8 and 6.1.1.4'
  'H'  'H'   0.0000   0.0000
  'International Tables Vol C Tables 4.2.6.8 and 6.1.1.4'
  'O'  'O'   0.0106   0.0060
  'International Tables Vol C Tables 4.2.6.8 and 6.1.1.4'
  'In'  'In'  -0.7276   1.3100
  'International Tables Vol C Tables 4.2.6.8 and 6.1.1.4'

_symmetry_cell_setting            Monoclinic
_symmetry_space_group_name_H-M    P2(1)/c

loop_
  _symmetry_equiv_pos_as_xyz
  'x, y, z'
  '-x, y+1/2, -z+1/2'
  '-x, -y, -z'
  'x, -y-1/2, z-1/2'

_cell_length_a                    6.7719(10)
_cell_length_b                    10.3293(15)
_cell_length_c                    20.152(3)
_cell_angle_alpha                 90.00
_cell_angle_beta                  97.573(3)
_cell_angle_gamma                 90.00
_cell_volume                      1397.3(4)
_cell_formula_units_Z             4
_cell_measurement_temperature     296(2)
_cell_measurement_reflns_used     ?
_cell_measurement_theta_min       ?
_cell_measurement_theta_max       ?

_exptl_crystal_description        prismas
_exptl_crystal_colour             colorle
_exptl_crystal_size_max           0.08
_exptl_crystal_size_mid           0.08
_exptl_crystal_size_min           0.02
_exptl_crystal_density_meas       ?
_exptl_crystal_density_diffrn     2.504
_exptl_crystal_density_method     ?
_exptl_crystal_F_000              1004
_exptl_absorpt_coefficient_mu     3.348
_exptl_absorpt_correction_type   Sadabs
_exptl_absorpt_correction_T_min   1.437
_exptl_absorpt_correction_T_max   0.472

_exptl_special_details
;
  ?
;

_diffrn_ambient_temperature       296(2)
_diffrn_radiation_wavelength      0.71073
_diffrn_radiation_type            MoK\a
_diffrn_radiation_source          'fine-focus sealed tube'
_diffrn_radiation_monochromator   graphite
_diffrn_measurement_device        ?
_diffrn_measurement_method        'phi and omega scans'
_diffrn_standards_number          ?
_diffrn_standards_interval_count  ?
_diffrn_standards_interval_time   ?
_diffrn_standards_decay_%         ?
_diffrn_reflns_number             6876
_diffrn_reflns_av_R_equivalents   0.0834
_diffrn_reflns_av_sigmaI/netI     0.1177
_diffrn_reflns_limit_h_min        -8
_diffrn_reflns_limit_h_max        8
_diffrn_reflns_limit_k_min        -12
_diffrn_reflns_limit_k_max        12
_diffrn_reflns_limit_l_min        -23
_diffrn_reflns_limit_l_max        25
_diffrn_reflns_theta_min          3.87
_diffrn_reflns_theta_max          26.37
_reflns_number_total              2726
_reflns_number_observed           1815
_reflns_observed_criterion        >2sigma(I)

_computing_data_collection        'Bruker SMART'
_computing_cell_refinement        'Bruker SMART'
_computing_data_reduction         'Bruker SAINT'
_computing_structure_solution     'SHELXS-86 (Sheldrick, 1990)'
_computing_structure_refinement   'SHELXL-93 (Sheldrick, 1993)'
_computing_molecular_graphics     'Bruker SHELXTL'
_computing_publication_material   'Bruker SHELXTL'

_refine_special_details
;
  Refinement on F^2^ for ALL reflections except for 0 with very negative F^2^
  or flagged by the user for potential systematic errors.  Weighted R-factors
  wR and all goodnesses of fit S are based on F^2^, conventional R-factors R
  are based on F, with F set to zero for negative F^2^. The observed
criterion
  of F^2^ > 2sigma(F^2^) is used only for calculating _R_factor_obs etc. and
is
  not relevant to the choice of reflections for refinement.  R-factors based
  on F^2^ are statistically about twice as large as those based on F, and R-
  factors based on ALL data will be even larger.
;

_refine_ls_structure_factor_coef  Fsqd
_refine_ls_matrix_type            full
_refine_ls_weighting_scheme
  'calc w=1/[\s^2^(Fo^2^)+(0.0501P)^2^+0.0000P] where P=(Fo^2^+2Fc^2^)/3'
_atom_sites_solution_primary      direct
_atom_sites_solution_secondary    difmap
_atom_sites_solution_hydrogens    Fourier
_refine_ls_hydrogen_treatment     ?
_refine_ls_extinction_method      none
_refine_ls_extinction_coef        ?
_refine_ls_number_reflns          2726
_refine_ls_number_parameters      225
_refine_ls_number_restraints      0
_refine_ls_R_factor_all           0.0991
_refine_ls_R_factor_obs           0.0513
_refine_ls_wR_factor_all          0.1067
_refine_ls_wR_factor_obs          0.0948
_refine_ls_goodness_of_fit_all    0.911
_refine_ls_goodness_of_fit_obs    1.013
_refine_ls_restrained_S_all       0.911
_refine_ls_restrained_S_obs       1.013
_refine_ls_shift/esd_max          -0.061
_refine_ls_shift/esd_mean         0.004

loop_
  _atom_site_label
  _atom_site_type_symbol
  _atom_site_fract_x
  _atom_site_fract_y
  _atom_site_fract_z
  _atom_site_U_iso_or_equiv
  _atom_site_thermal_displace_type
  _atom_site_occupancy
  _atom_site_calc_flag
  _atom_site_refinement_flags
  _atom_site_disorder_group
In1 In 0.14349(10) 0.43048(7) 0.23968(3) 0.0168(2) Uani 1 d . .
In2 In 0.65935(10) 0.26706(7) 0.26636(3) 0.0152(2) Uani 1 d . .
O1 O 0.1773(9) 0.2361(6) 0.2001(3) 0.0190(15) Uani 1 d . .
O2 O 0.4848(10) 0.2043(7) 0.1725(3) 0.026(2) Uani 1 d . .
O3 O 0.1148(10) 0.3796(9) 0.3417(3) 0.039(2) Uani 1 d . .
O4 O 0.8088(10) 0.3265(8) 0.3631(3) 0.028(2) Uani 1 d . .
O5 O 0.5324(10) 0.1240(6) 0.3308(3) 0.022(2) Uani 1 d . .
O6 O 0.2151(10) 0.4862(7) 0.1406(3) 0.023(2) Uani 1 d . .
O7 O 0.1362(10) 0.6272(7) 0.2556(4) 0.026(2) Uani 1 d . .
O8 O 0.4463(10) 0.4110(7) 0.2762(4) 0.024(2) Uani 1 d . .
O9 O -0.1684(10) 0.4029(7) 0.2149(4) 0.023(2) Uani 1 d . .
C1 C 0.2975(14) 0.2061(9) 0.1586(5) 0.016(2) Uani 1 d . .
C2 C 0.2121(14) 0.1773(9) 0.0885(4) 0.015(2) Uani 1 d . .
C3 C 0.3379(14) 0.1397(11) 0.0426(5) 0.025(3) Uani 1 d . .
H3 H 0.4715(14) 0.1227(11) 0.0569(5) 0.030 Uiso 1 calc R .
C4 C 0.2638(15) 0.1276(11) -0.0243(5) 0.027(2) Uani 1 d . .
H4 H 0.3480(15) 0.1035(11) -0.0551(5) 0.032 Uiso 1 calc R .
C5 C 1.0651(15) 0.3489(9) 0.4545(5) 0.019(2) Uani 1 d . .
C6 C 0.9384(15) 0.3137(10) 0.4991(5) 0.026(3) Uani 1 d . .
H6 H 0.8047(15) 0.2983(10) 0.4840(5) 0.031 Uiso 1 calc R .
C7 C 0.0083(15) 0.1992(10) 0.0664(5) 0.024(2) Uani 1 d . .
H7' H -0.0780(15) 0.2219(10) 0.0968(5) 0.028 Uiso 1 calc R .
C8 C 0.9897(16) 0.3541(10) 0.3801(5) 0.021(2) Uani 1 d . .
C9 C 0.6315(14) 0.0469(9) 0.3706(4) 0.016(2) Uani 1 d . .
C10 C 0.5622(15) 0.0227(10) 0.4381(4) 0.019(2) Uani 1 d . .
C11 C 0.3700(16) 0.0532(10) 0.4478(5) 0.028(3) Uani 1 d . .
C12 C 0.6909(15) -0.0306(11) 0.4899(5) 0.024(2) Uani 1 d . .
H7 H 0.0914(139) 0.6672(97) 0.2862(49) 0.016(29) Uiso 1 d . .
H9 H -0.2008(130) 0.4740(90) 0.2037(44) 0.000(24) Uiso 1 d . .
H11 H 0.2641(151) 0.1117(108) 0.4088(53) 0.039(31) Uiso 1 d . .
H12 H 0.8278 0.0000 0.4882 0.082(48) Uiso 1 d . .
H8 H 0.4961(152) 0.4522(101) 0.3072(52) 0.021(32) Uiso 1 d . .

loop_
  _atom_site_aniso_label
  _atom_site_aniso_U_11
  _atom_site_aniso_U_22
  _atom_site_aniso_U_33
  _atom_site_aniso_U_23
  _atom_site_aniso_U_13
  _atom_site_aniso_U_12
In1 0.0166(3) 0.0200(4) 0.0145(3) -0.0004(3) 0.0046(3) -0.0003(3)
In2 0.0149(3) 0.0187(4) 0.0121(3) 0.0009(3) 0.0020(3) 0.0010(3)
O1 0.023(4) 0.016(4) 0.020(4) -0.009(3) 0.011(3) -0.006(3)
O2 0.021(4) 0.042(5) 0.015(4) -0.008(3) 0.001(3) -0.001(3)
O3 0.031(4) 0.075(6) 0.010(4) 0.011(4) 0.004(3) -0.006(4)
O4 0.020(4) 0.054(5) 0.008(3) -0.003(3) -0.003(3) -0.004(4)
O5 0.037(4) 0.019(4) 0.012(3) 0.002(3) 0.009(3) 0.006(3)
O6 0.030(4) 0.027(4) 0.015(4) -0.009(3) 0.014(3) -0.008(3)
O7 0.019(4) 0.019(4) 0.043(5) -0.007(4) 0.018(4) -0.003(3)
O8 0.020(4) 0.031(5) 0.021(4) -0.004(3) 0.003(3) 0.003(4)
O9 0.022(4) 0.017(4) 0.029(4) 0.008(3) 0.007(3) 0.002(3)
C1 0.018(5) 0.010(5) 0.017(5) 0.000(4) -0.004(4) 0.000(4)
C2 0.023(5) 0.020(5) 0.002(4) -0.003(4) -0.003(4) 0.002(4)
C3 0.015(5) 0.041(7) 0.018(6) -0.013(5) -0.002(4) 0.007(5)
C4 0.026(6) 0.037(7) 0.018(5) -0.005(5) 0.007(5) 0.010(5)
C5 0.027(5) 0.014(5) 0.016(5) 0.011(4) 0.003(4) 0.003(4)
C6 0.021(6) 0.030(6) 0.025(6) -0.004(5) -0.007(5) -0.004(5)
C7 0.022(5) 0.036(7) 0.014(5) -0.002(5) 0.007(4) 0.010(5)
C8 0.031(6) 0.022(6) 0.010(5) 0.004(4) 0.003(5) 0.004(5)
C9 0.021(5) 0.017(5) 0.011(5) 0.003(4) 0.005(4) -0.007(4)
C10 0.028(6) 0.027(6) 0.005(5) 0.001(4) 0.008(4) 0.004(5)
C11 0.039(7) 0.023(6) 0.025(6) 0.000(5) 0.012(5) 0.009(5)
C12 0.018(5) 0.037(6) 0.019(6) -0.001(5) 0.010(4) 0.007(5)

_geom_special_details
;
  All esds (except the esd in the dihedral angle between two l.s. planes)
  are estimated using the full covariance matrix.  The cell esds are taken
  into account individually in the estimation of esds in distances, angles
  and torsion angles; correlations between esds in cell parameters are only
  used when they are defined by crystal symmetry.  An approximate (isotropic)
  treatment of cell esds is used for estimating esds involving l.s. planes.
;

loop_
  _geom_bond_atom_site_label_1
  _geom_bond_atom_site_label_2
  _geom_bond_distance
  _geom_bond_site_symmetry_2
  _geom_bond_publ_flag
In1 O7 2.058(7) . ?
In1 O8 2.095(7) . ?
In1 O9 2.124(7) . ?
In1 O3 2.156(6) . ?
In1 O1 2.183(6) . ?
In1 O6 2.193(6) . ?
In2 O7 2.088(7) 2_645 ?
In2 O8 2.099(7) . ?
In2 O4 2.164(6) . ?
In2 O9 2.174(7) 1_655 ?
In2 O2 2.192(6) . ?
In2 O5 2.215(6) . ?
O1 C1 1.280(11) . ?
O2 C1 1.262(11) . ?
O3 C8 1.248(11) 1_455 ?
O4 C8 1.260(12) . ?
O5 C9 1.258(11) . ?
O6 C9 1.259(11) 2_655 ?
O7 In2 2.088(7) 2_655 ?
O7 H7 0.83(10) . ?
O8 H8 0.79(10) . ?
O9 In2 2.174(7) 1_455 ?
O9 H9 0.79(9) . ?
C1 C2 1.484(12) . ?
C2 C3 1.394(13) . ?
C2 C7 1.412(13) . ?
C3 C4 1.380(13) . ?
C3 H3 0.93 . ?
C4 C5 1.379(13) 4_465 ?
C4 H4 0.93 . ?
C5 C6 1.372(13) . ?
C5 C4 1.379(13) 4_666 ?
C5 C8 1.519(13) . ?
C6 C7 1.383(14) 4_666 ?
C6 H6 0.93 . ?
C7 C6 1.383(14) 4_465 ?
C7 H7' 0.93 . ?
C8 O3 1.248(11) 1_655 ?
C9 O6 1.259(11) 2_645 ?
C9 C10 1.517(12) . ?
C10 C11 1.379(14) . ?
C10 C12 1.383(14) . ?
C11 C12 1.392(14) 3_656 ?
C11 H11 1.16(11) . ?
C12 C11 1.392(14) 3_656 ?
C12 H12 0.984(10) . ?

loop_
  _geom_angle_atom_site_label_1
  _geom_angle_atom_site_label_2
  _geom_angle_atom_site_label_3
  _geom_angle
  _geom_angle_site_symmetry_1
  _geom_angle_site_symmetry_3
  _geom_angle_publ_flag
O7 In1 O8 94.7(3) . . ?
O7 In1 O9 97.2(3) . . ?
O8 In1 O9 165.1(3) . . ?
O7 In1 O3 94.9(3) . . ?
O8 In1 O3 81.3(3) . . ?
O9 In1 O3 88.9(3) . . ?
O7 In1 O1 166.0(3) . . ?
O8 In1 O1 84.0(3) . . ?
O9 In1 O1 86.5(3) . . ?
O3 In1 O1 98.7(3) . . ?
O7 In1 O6 84.0(3) . . ?
O8 In1 O6 91.2(3) . . ?
O9 In1 O6 98.8(3) . . ?
O3 In1 O6 172.3(3) . . ?
O1 In1 O6 82.1(2) . . ?
O7 In2 O8 173.2(3) 2_645 . ?
O7 In2 O4 98.2(3) 2_645 . ?
O8 In2 O4 87.7(3) . . ?
O7 In2 O9 86.2(3) 2_645 1_655 ?
O8 In2 O9 90.4(3) . 1_655 ?
O4 In2 O9 91.7(3) . 1_655 ?
O7 In2 O2 84.8(3) 2_645 . ?
O8 In2 O2 89.5(3) . . ?
O4 In2 O2 175.0(2) . . ?
O9 In2 O2 92.4(3) 1_655 . ?
O7 In2 O5 89.0(3) 2_645 . ?
O8 In2 O5 95.3(3) . . ?
O4 In2 O5 80.3(3) . . ?
O9 In2 O5 170.0(3) 1_655 . ?
O2 In2 O5 95.8(3) . . ?
C1 O1 In1 124.6(6) . . ?
C1 O2 In2 126.8(6) . . ?
C8 O3 In1 142.8(6) 1_455 . ?
C8 O4 In2 129.1(6) . . ?
C9 O5 In2 125.4(6) . . ?
C9 O6 In1 125.4(6) 2_655 . ?
In2 O7 In1 128.3(3) 2_655 . ?
In2 O7 H7 97.4(69) 2_655 . ?
In1 O7 H7 128.6(70) . . ?
In2 O8 In1 133.5(4) . . ?
In2 O8 H8 103.2(75) . . ?
In1 O8 H8 121.3(75) . . ?
In1 O9 In2 123.6(3) . 1_455 ?
In1 O9 H9 99.9(66) . . ?
In2 O9 H9 126.1(65) 1_455 . ?
O2 C1 O1 124.4(8) . . ?
O2 C1 C2 117.5(8) . . ?
O1 C1 C2 118.0(8) . . ?
C3 C2 C7 119.5(8) . . ?
C3 C2 C1 119.5(8) . . ?
C7 C2 C1 120.7(8) . . ?
C4 C3 C2 119.9(9) . . ?
C4 C3 H3 120.0(6) . . ?
C2 C3 H3 120.0(5) . . ?
C3 C4 C5 120.1(9) . 4_465 ?
C3 C4 H4 120.0(6) . . ?
C5 C4 H4 120.0(6) 4_465 . ?
C6 C5 C4 120.8(9) . 4_666 ?
C6 C5 C8 119.9(9) . . ?
C4 C5 C8 119.2(9) 4_666 . ?
C5 C6 C7 120.4(9) . 4_666 ?
C5 C6 H6 119.8(6) . . ?
C7 C6 H6 119.8(6) 4_666 . ?
C6 C7 C2 119.3(9) 4_465 . ?
C6 C7 H7' 120.4(6) 4_465 . ?
C2 C7 H7' 120.4(5) . . ?
O3 C8 O4 126.5(9) 1_655 . ?
O3 C8 C5 116.8(9) 1_655 . ?
O4 C8 C5 116.6(8) . . ?
O5 C9 O6 125.8(8) . 2_645 ?
O5 C9 C10 118.2(8) . . ?
O6 C9 C10 115.9(8) 2_645 . ?
C11 C10 C12 119.7(9) . . ?
C11 C10 C9 120.0(9) . . ?
C12 C10 C9 120.3(9) . . ?
C10 C11 C12 119.2(10) . 3_656 ?
C10 C11 H11 122.2(50) . . ?
C12 C11 H11 118.0(50) 3_656 . ?
C10 C12 C11 121.1(9) . 3_656 ?
C10 C12 H12 110.4(10) . . ?
C11 C12 H12 118.5(10) 3_656 . ?

_refine_diff_density_max    0.841
_refine_diff_density_min   -1.239
_refine_diff_density_rms    0.220

#===END
